# Supplementary material for: Cough and Bronchial Responsiveness in Firefighters at the World Trade Center Site
Source: Atypon-hosted journal article supplement (doi:10.1056/nejmoa021300), 2002-09-12
Supplement: nejm_prezant_806sa1.pdf [file nejm_prezant_806sa1.pdf]

# Supplementary Appendix

This appendix has been provided by the authors to give readers additional information about their work.

Supplement to: Prezant DJ, Weiden M, Banauch GI, et al. Cough and Bronchial Responsiveness in Firefighters at the World Trade Center Site. *N Engl J Med* 2002;347:806-15.

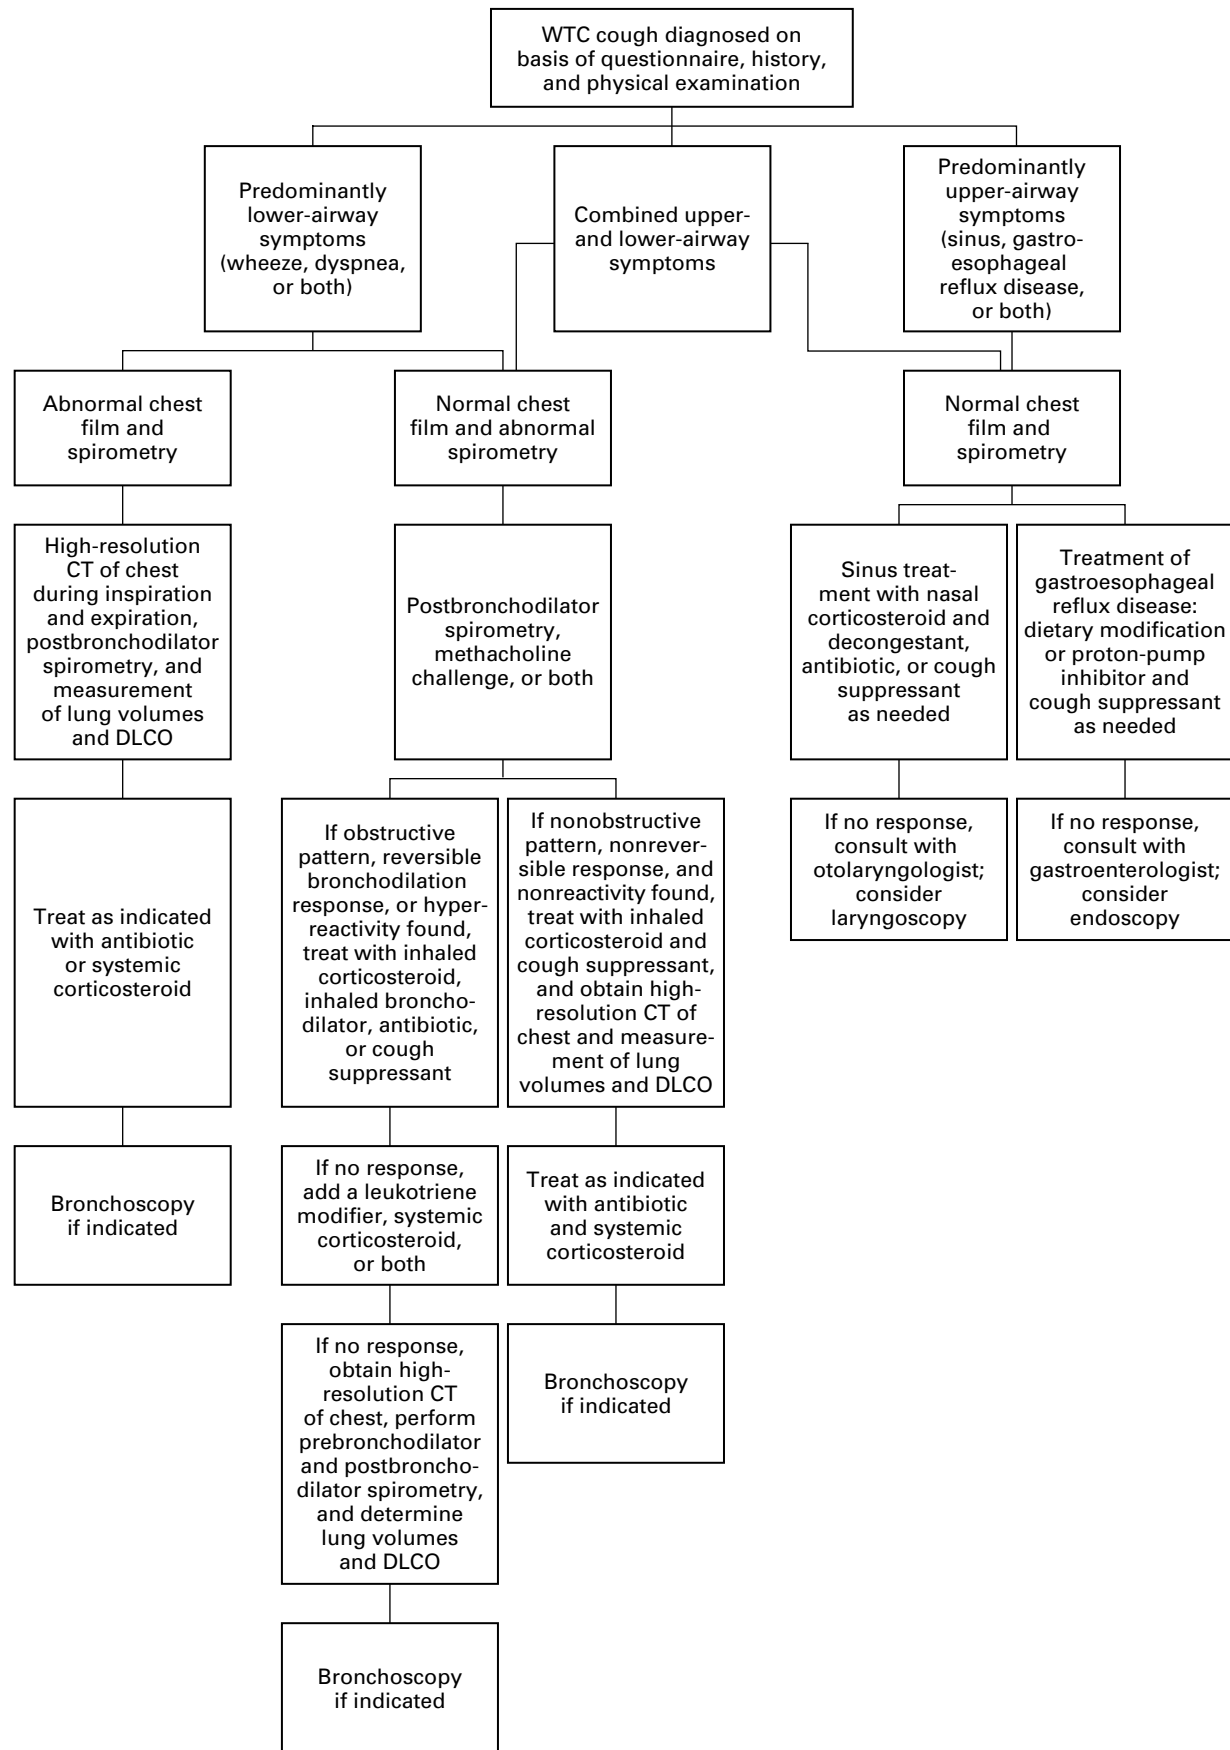

**Supplementary Appendix 1.** Algorithm for the Diagnosis and Treatment of World Trade Center (WTC) Cough. CT denotes computed tomography, and DLCO carbon monoxide diffusing capacity.
